# Supplementary material
Source: bioRxiv or medRxiv preprint supplement (https://www.biorxiv.org/highwire/filestream/54442/field_highwire_adjunct_files/3/138222-4.pdf)

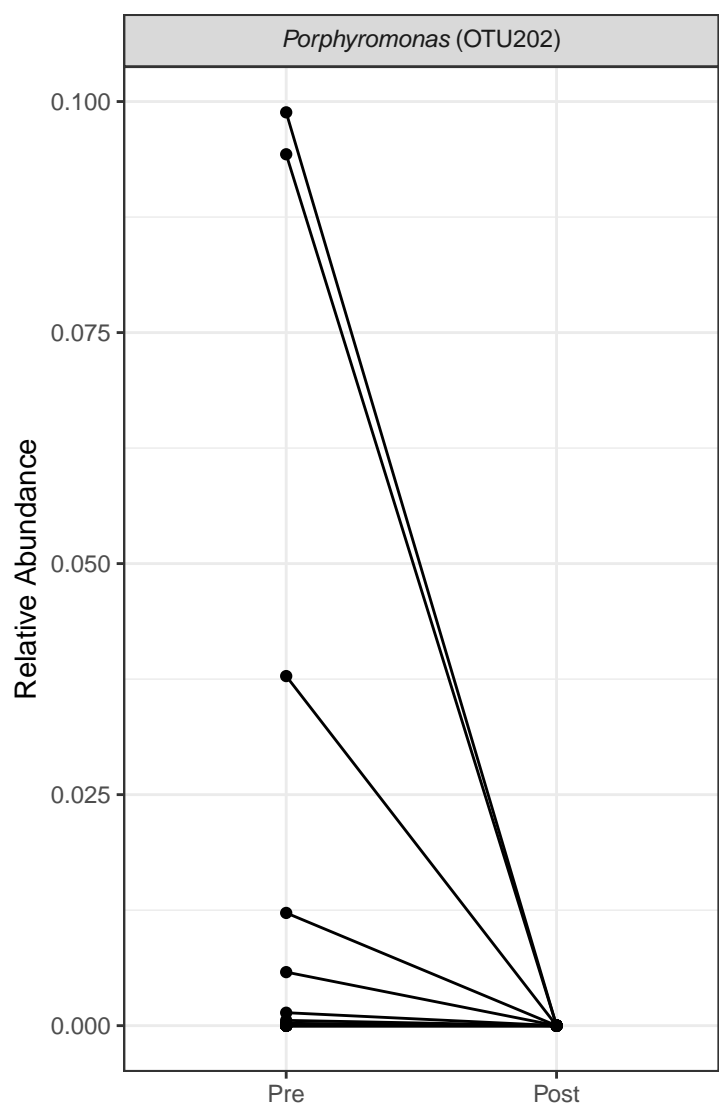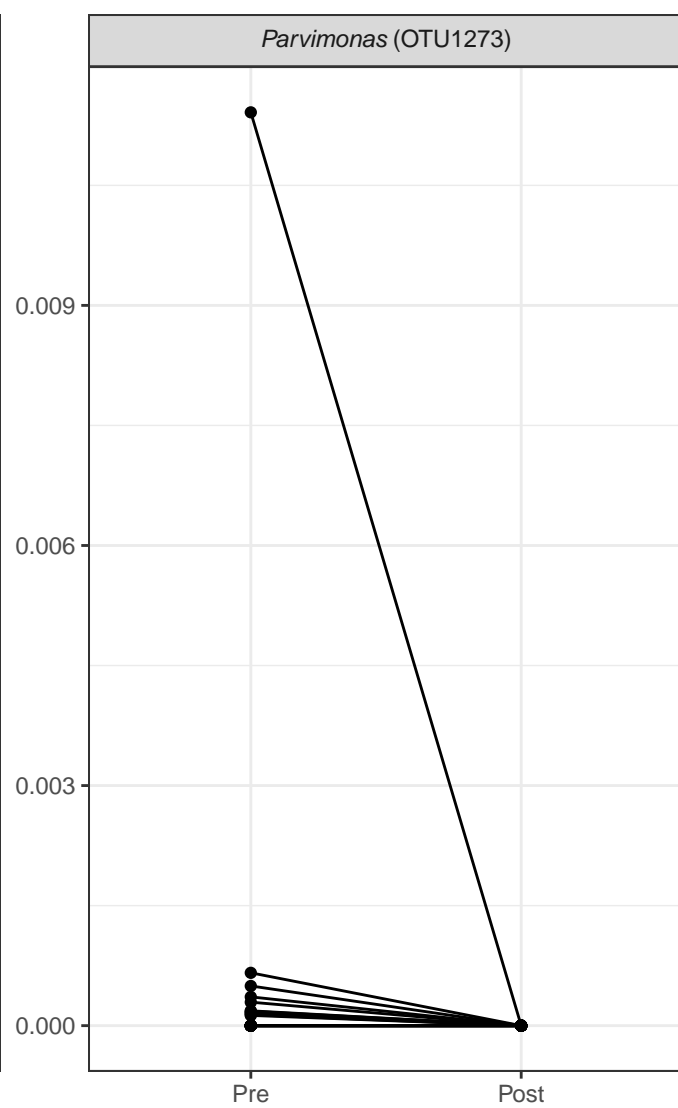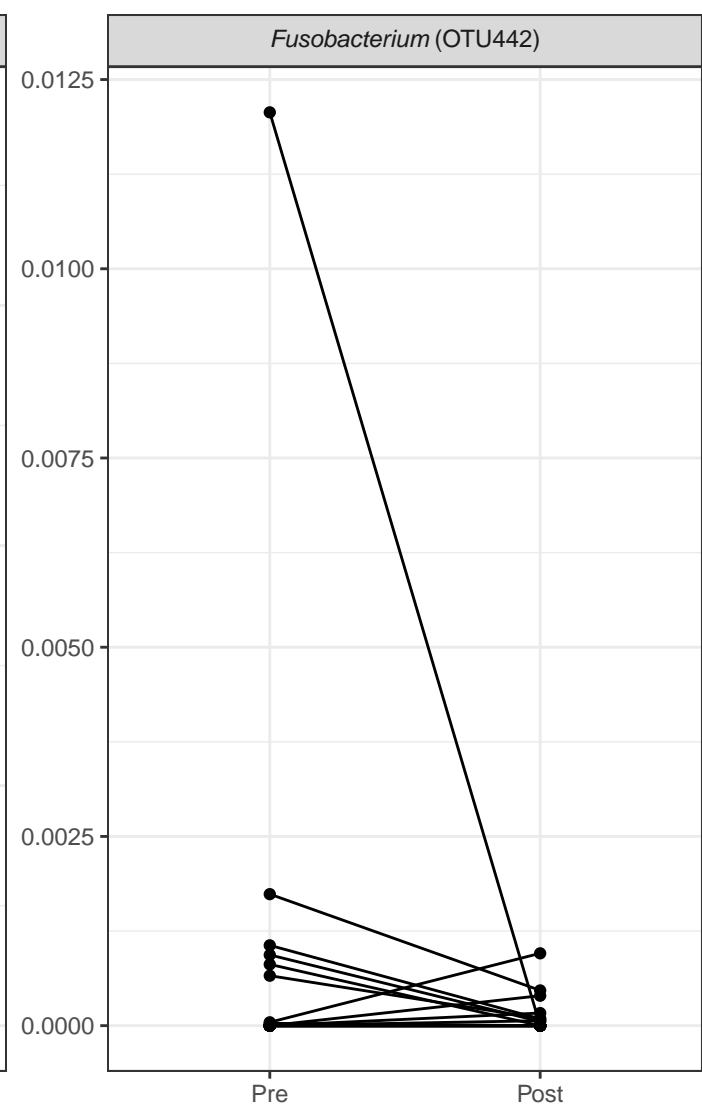

Supplement: Supplementary file [file 138222-4.pdf]
